# Supplementary material for: Organic Nonlinear Optical Crystals for Highly Efficient Terahertz-Wave Generation
Source: MDPI journal article supplement (doi:10.3390/cryst13010144), 2023-01-13
Supplement: s1 [file s1]

## Supplementary Materials

# Organic nonlinear optical crystals for highly efficient terahertz-wave generation

Ying Yang<sup>1</sup>, Xinyuan Zhang<sup>1,\*</sup>, Zhanggui Hu<sup>1</sup> and Yicheng Wu<sup>1</sup>

<sup>1</sup> Tianjin Key Laboratory of Functional Crystal Materials, Institute of Functional Crystals, Tianjin University of Technology, Tianjin 300384, PR. China.

**Table S1.** The compounds mentioned in different structure series.

| Series                | Chemical Structure |                                                                                                        | Full names of crystals                                                                               |
|-----------------------|--------------------|--------------------------------------------------------------------------------------------------------|------------------------------------------------------------------------------------------------------|
| Pyridinium-based      |                    | DAST <sup>20</sup><br>(C <sub>23</sub> H <sub>26</sub> N <sub>2</sub> O <sub>3</sub> S)                | 4-Dimethylamino-N-methyl-4-stilbazolium tosylate                                                     |
|                       |                    | OHP-TFS <sup>28</sup><br>(C <sub>21</sub> H <sub>18</sub> NO <sub>4</sub> F <sub>3</sub> S)            | 4-(4-hydroxystyryl)-1-methylpyridinium-1-ium 4-(trifluoromethyl)benzenesulfonate                     |
|                       |                    | DHP-TFS <sup>33</sup><br>(C <sub>21</sub> H <sub>18</sub> NO <sub>5</sub> F <sub>3</sub> S)            | 4-(3,4-Dihydroxystyryl)-1-methylpyridinium 4-(trifluoromethyl)benzenesulfonate                       |
| Quinolinium-based     |                    | HMQ-T <sup>38</sup><br>(C <sub>26</sub> H <sub>25</sub> NO <sub>5</sub> S)                             | 2-(4-hydroxy-3-methoxystyryl)-1-methylquinolinium 4-methylbenzenesulfonate                           |
|                       |                    | HMQ-4TFS <sup>29</sup><br>(C <sub>26</sub> H <sub>22</sub> F <sub>3</sub> NO <sub>5</sub> S)           | 2-(4-hydroxy-3-methoxystyryl)-1-methylquinolinium 4-(trifluoromethyl)benzenesulfonate                |
|                       |                    | OHQ-T <sup>40</sup><br>(C <sub>25</sub> H <sub>23</sub> NO <sub>4</sub> S)                             | 2-(4-hydroxystyryl)-1-methylquinolinium 4-methylbenzenesulfonate                                     |
|                       |                    | OHQ-CBS <sup>44</sup><br>(C <sub>24</sub> H <sub>20</sub> ClNO <sub>4</sub> S)                         | 2-(4-hydroxystyryl)-1-methylquinolinium 4-chlorobenzenesulfonate                                     |
|                       |                    | OHQ-TFO <sup>45</sup><br>(C <sub>25</sub> H <sub>20</sub> F <sub>3</sub> N <sub>5</sub> O)             | 2-(4-hydroxystyryl)-1-methylquinolinium 4-(trifluoromethoxy)benzenesulfonate                         |
|                       |                    | HM7CIQ-CBS <sup>42</sup><br>(C <sub>25</sub> H <sub>21</sub> Cl <sub>2</sub> NO <sub>5</sub> S)        | 7-chloro-2-(4-hydroxy-3-methoxystyryl)-1-methylquinolinium 4-chlorobenzenesulfonate                  |
|                       |                    | HM6FQ-T <sup>43</sup><br>(C <sub>26</sub> H <sub>24</sub> FNO <sub>5</sub> S)                          | 6-fluoro-2-(4-hydroxy-3-methoxystyryl)-1-methylquinolinium 4-methylbenzenesulfonate                  |
|                       |                    | HM7CIQ-T <sup>42</sup><br>(C <sub>26</sub> H <sub>24</sub> ClNO <sub>5</sub> S)                        | 7-chloro-2-(4-hydroxy-3-methoxystyryl)-1-methylquinolinium 4-methylbenzenesulfonate                  |
| Benzothiazolium-based |                    | PMB-T <sup>46</sup><br>(C <sub>29</sub> H <sub>32</sub> N <sub>2</sub> O <sub>4</sub> S <sub>2</sub> ) | 2-(4-(4-(hydroxymethyl)piperidin-1-yl)styryl)-3-methylbenzo[d]thiazol-3-ium 4-methylbenzenesulfonate |

| Series                | Chemical Structure |                                                                                                                          | Full names of crystals                                                                                               |
|-----------------------|--------------------|--------------------------------------------------------------------------------------------------------------------------|----------------------------------------------------------------------------------------------------------------------|
| Benzothiazolium-based |                    | HMB-TMS <sup>47</sup><br>(C <sub>26</sub> H <sub>27</sub> NO <sub>5</sub> S <sub>2</sub> )                               | 2-(4-hydroxy-3-methoxystyryl)-3-methylbenzo-<br>[d]thiazol-3-ium 2,4,6-trimethylbenzenesulfonate                     |
|                       |                    | HDB-T <sup>48</sup><br>(C <sub>25</sub> H <sub>25</sub> NO <sub>4</sub> S <sub>2</sub> )                                 | 2-(4-hydroxy-3,5-dimethylstyryl)-3-methylbenz-<br>o[d]thiazol-3-ium 4- methylbenzenesulfonate                        |
|                       |                    | OHB-TFO <sup>49</sup><br>(C <sub>23</sub> H <sub>18</sub> F <sub>3</sub> NO <sub>5</sub> S <sub>2</sub> )                | 2-(4-hydroxystyryl)-3-methylbenzothiazol-3-ium<br>4-(trifluoromethoxy)benzenesulfonate                               |
|                       |                    | PFB-CBS <sup>50</sup><br>(C <sub>28</sub> H <sub>28</sub> ClFN <sub>2</sub> O <sub>4</sub> S <sub>2</sub> )              | 5-fluoro-2-(4-(4-(hydroxymethyl)piperidin-1-<br>yl)styryl)-3-methylbenzothiazol-3-ium<br>4-chlorobenzenesulfonate    |
|                       |                    | PMB-4TFS <sup>27</sup><br>(C <sub>29</sub> H <sub>29</sub> N <sub>2</sub> O <sub>4</sub> S <sub>2</sub> F <sub>3</sub> ) | 2-(4-(4-(hydroxymethyl)piperidin-1-yl)styryl)-3-<br>methylbenzothiazol-3-ium<br>4-(trifluoromethyl) benzenesulfonate |
|                       |                    | PMB-TFO <sup>51</sup><br>(C <sub>29</sub> H <sub>29</sub> N <sub>2</sub> O <sub>5</sub> S <sub>2</sub> )                 | 2-(4-(4-(hydroxymethyl)piperidin-1-yl)styryl)-3-<br>methylbenzothiazol-3-ium<br>4-(trifluoromethoxy)benzenesulfonate |
| Indolium-based        |                    | EHPSI-4NBS <sup>52</sup><br>(C <sub>32</sub> H <sub>37</sub> N <sub>3</sub> O <sub>6</sub> S)                            | (E)-1-ethyl-2-(4-(4-(hydroxymethyl)piperidin-1-<br>yl)styryl)-3,3-dimethyl-3H-indol-1-ium<br>4-nitrobenzenesulfonate |
|                       |                    | OHI-T <sup>53</sup><br>(C <sub>26</sub> H <sub>27</sub> NO <sub>4</sub> S)                                               | 2-(4-hydroxy)styryl-1,3,3-trimethylindolenium<br>4-methylbenzenesulfonate                                            |
| Benzoindolium-based   |                    | P-BI <sup>54</sup><br>(C <sub>25</sub> H <sub>27</sub> IN <sub>2</sub> )                                                 | (E)-2-(4-(dimethylamino)styryl)-1,1,3-trimethyl-<br>1H-benzo[e]indol-3-ium iodide                                    |
|                       |                    | MBI <sup>55</sup><br>(C <sub>24</sub> H <sub>24</sub> NOI)                                                               | (E)-2-(4-(Methoxy)styryl)-1,1,3-trimethyl-1H-<br>benzo[e]indol-3-ium iodide                                          |
| Benzimidazolium-based |                    | HMI-TMS <sup>56</sup><br>(C <sub>27</sub> H <sub>30</sub> N <sub>2</sub> O <sub>5</sub> S)                               | 2-(4-hydroxy-3-methoxystyryl)-1,3-dimethyl-1H-<br>benzimidazol-3-ium<br>2,4,6-trimethylbenzenesulfonate              |
